# Supplementary material
Source: Springer Nature journal article supplement (https://www.springermedizin.de/resource/supplementary/13561_2012_34_MOESM1_ESM.pdf/9687296)
Supplement: MOESM1 [file 9687296]

Atripla™  
(TDF / emtricitabine / efavirenz)

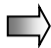

Viread™ (TDF) + generic lamivudine +  
+ Sustiva™ (efavirenz)

Combivir™  
(zidovudine / lamivudine)

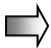

generic zidovudine + generic lamivudine

Kivexa™  
(lamivudine / abacavir)

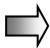

generic lamivudine + Ziagen™ (abacavir)

Trizivir™  
(zidovudine / lamivudine / abacavir)

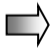

generic zidovudine + generic lamivudine +  
+ Ziagen™ (abacavir)

Truvada™  
(TDF / emtricitabine)

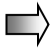

Viread™ (TDF) + generic lamivudine
